# Supplementary material for: Irradiation-Induced Upregulation of miR-711 Inhibits DNA Repair and Promotes Neurodegeneration Pathways
Source: PubMed Central journal article supplement (PMC7432239; doi:10.3390/ijms21155239), 2020-07-23
Supplement: ijms-21-05239-s001.pdf [file ijms-21-05239-s001.pdf]

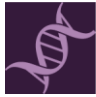

## Supplementary Figures

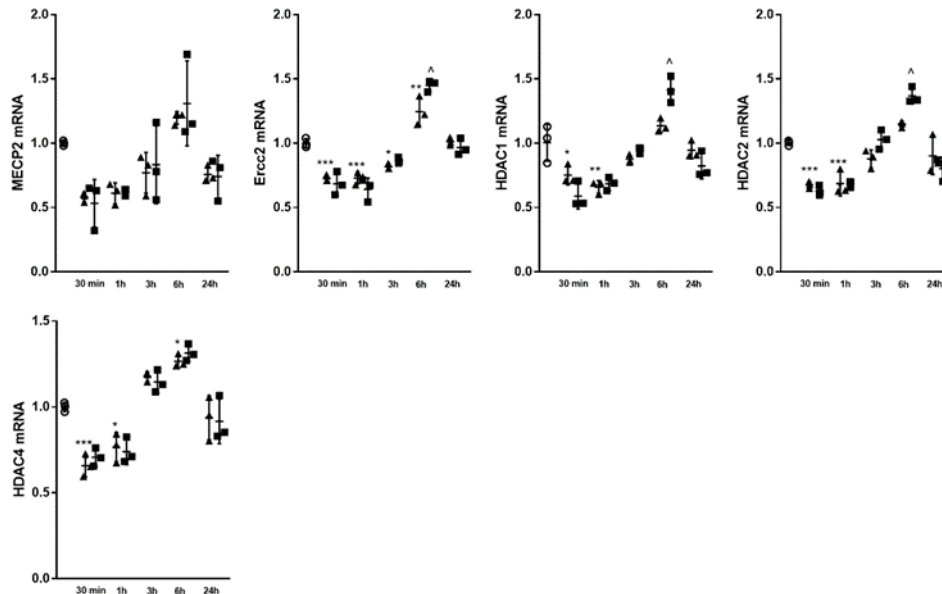

**Figure S1.** qPCR quantification of MECP2, Ercc2, HDAC1, HDAC2 and HDAC4 (E). Mecp2 mRNA [F(10,22) = 7.046, no significant changes], Ercc2 mRNA [F(10,22) = 50.29,  $p = 0.0006$  at 30m,  $p = 0.0008$  at 1h,  $p = 0.0406$  at 3h,  $p = 0.0024$  at 6h after IR with miR-ve inhibitor compared to control; for miR-711 inhibitor compared to miR-ve inhibitor,  $p = 0.0167$  at 6h], HDAC 1 mRNA [F(10,22) = 25.88,  $p = 0.0298$  at 30m,  $p = 0.0012$  at 1h after IR with miR-ve inhibitor compared to control; for miR-711 inhibitor compared to miR-ve inhibitor,  $p = 0.0130$  at 6h], HDAC2 mRNA [F(10,22) = 30.71,  $p = 0.0006$  at 30m,  $p = 0.0009$  at 1h after IR with miR-ve inhibitor compared to control; for miR-711 inhibitor compared to miR-ve inhibitor,  $p = 0.0352$  at 6h], HDAC 4 mRNA [F(10,22) = 28.71,  $p = 0.0006$  at 30m,  $p = 0.0309$  at 1h,  $p = 0.0101$  at 6h after IR with miR-ve inhibitor compared to control]. N = 3/group for all groups, \* $p < 0.05$ , \*\* $p < 0.01$ , \*\*\* $p < 0.001$  vs. control; ^ $p < 0.05$ , vs. corresponding 8Gy + miR-ve inhibitor group.

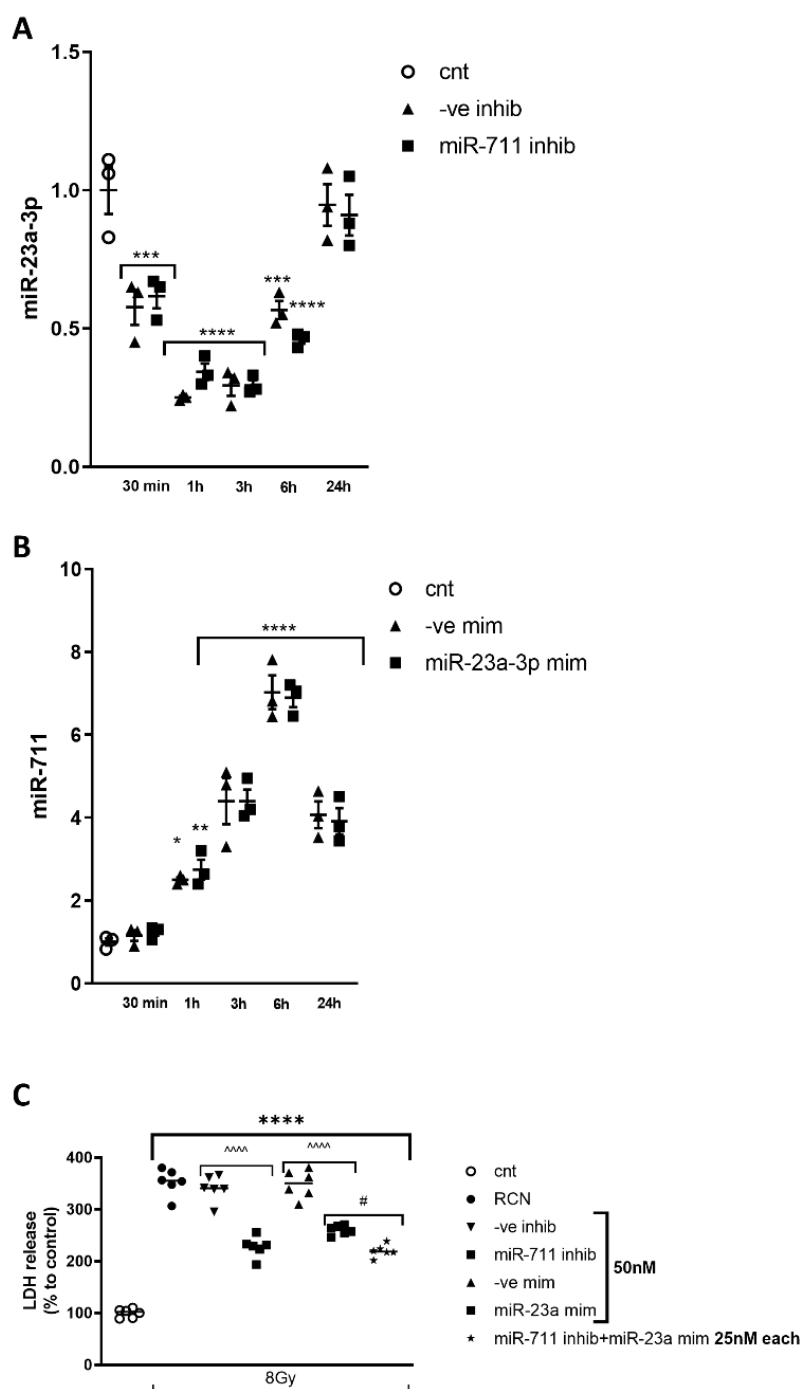

**Figure S2.** miR-711 inhibition did not alter the IR-induced down-regulation of miR-23a-3p. **(A)** RCNs were transfected with miR-711 inhibitor and miR-ve inhibitor 1h before exposure to 8Gy. qPCR quantification of miR-23a-3p [F(10,22) = 29.56,  $p < 0.0003$  at 30min after IR for miR-ve inhibitor,  $p < 0.001$  for miR-711 inhibitor;  $p < 0.0001$  for miR-ve inhibitor and miR-711 inhibitor at 1, 3 and 6h after IR for both compared to non-irradiated control. **(B)** RCNs were transfected with miR-23a-3p mimic and miR-ve mimic 1h before exposure to 8Gy. qPCR quantification of miR-23a-3p [F(10,22) = 54.32,  $p < 0.0379$  at 1h after IR for miR-ve mimic,  $p < 0.0099$  for miR-23a-3p mimic;  $p < 0.0001$  for miR-ve inhibitor and miR-711 inhibitor at 3, 6 and 24h after IR for both compared to non-irradiated control. N = 3/group for all groups, \* $p < 0.05$ , \*\* $p < 0.01$ , \*\*\* $p < 0.001$ , \*\*\*\* $p < 0.0001$  vs. control. **(C)** LDH was measured 24h after irradiation [F(6,35) = 132.4,  $p < 0.0001$  at 24h after IR compared to non-irradiated

control;  $p < 0.0001$  for miR-711 inhibitor compared to miR-ve inhibitor,  $p < 0.0001$  for miR-23a-3p mimic compared to miR-ve mimic, inhibitor,  $p < 0.0169$  for miR-23a-3p mimic (25nM) + miR-711 inhibitor (25nM) compared to miR-23a-3p mimic (50nM). N = 6/group, \*\*\*\* $p < 0.0001$  vs. control, ^^^ $p < 0.0001$  vs. miR-ve mimic and inhibitor, # $p < 0.05$  vs miR-23a-3p mimic.

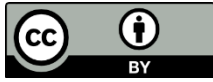

© 2020 by the authors. Submitted for possible open access publication under the terms and conditions of the Creative Commons Attribution (CC BY) license (<http://creativecommons.org/licenses/by/4.0/>).
